1  
2  
3  
4  
5  
6  
7  
8  
9  
10  
11  
12  
13  
14  
15  
16  
17  
18  
19  
20  
21  
22

## MITF Isoforms- Insights from an RNA-Seq study

Kritika Kirty<sup>1\*</sup>, Snævar Sigurðsson<sup>1</sup>, Þorkell Guðjónsson<sup>1</sup>, Berglind Ósk Einarsdóttir,  
Stefán Sigurðsson<sup>1</sup>

<sup>1</sup>Department of Biochemistry and Molecular Biology, Biomedical Center, Faculty of  
Medicine, University of Iceland, Sturlugata 8, 102 Reykjavik, Iceland.

\*corresponding author, email: [kritikakirty@gmail.com](mailto:kritikakirty@gmail.com)

Keywords: MITF, MITF-Mdel, Isoforms, RNA-seq, siRNA

WITHDRAWN  
see manuscript DOI for details

## 23 **Abstract**

24 Isoforms play an essential role in enhancing evolutionary diversity. Microphthalmia  
25 inducing transcription factor (MITF) is known to be a master regulator of pigmentation  
26 response and a lineage survival oncogene in melanoma. MITF is also known to have  
27 several functional isoforms, the -M form is known to be essential for the melanocyte  
28 lineage and is the most widely studied in the context of pigmentation biology and  
29 melanoma development and progression. This study uses an RNA seq approach in  
30 order to examine changes in the transcriptional profile of Skmel28 cells when treated  
31 with double strand break inducing compound and/or after knockdown of MITF.  
32 Intriguingly, we observe an enrichment of MITF-Mdel isoform on both MITF knockdown  
33 as well as on induction of DNA damage. Closer examination revealed that the siRNA  
34 used for the study targets all MITF isoforms except MITF-Mdel. We also observe a  
35 protein band at the size predicted for the protein. We therefore hypothesize a potential  
36 redundant role for the MITF-Mdel isoform and a potential novel role in DNA double  
37 strand break response.

38

## 39 **Introduction**

40 The Microphthalmia associated transcription factor (MITF) is essential for development  
41 and regulation of various cell types like melanocytes, osteoclasts, mast cells, retinal  
42 pigment epithelial (RPE) cells of the eye and cardiomyocytes (Levy & Fisher, 2011;  
43 Steingrímsson, Copeland, & Jenkins, 2004; S. Tshori et al., 2007). Studies have also  
44 reported the importance of MITF in olfaction (Atacho et al., 2020). The MITF isoforms  
45 are known to be transcribed from several alternative promoters with distinct  
46 transcriptional start sites (Goding & Arnheiter, 2019; Vu, Dilshat, Fock, & Steingrímsson,  
47 2020). To this date, nine distinct mouse isoform mRNAs have been identified (MITF-A, -  
48 B, -C, -D, -E, -H, -J, -M, and -MC). These are generated via the alternative splicing of  
49 the first exon of MITF. Exons 2–9 of all MITF isoforms are identical (Bharti et al, 2008).  
50 Further, MITF-M shows the presence of two variants referred to as the + and – forms,  
51 with the – form missing a six amino acid sequence in exon 6 (residues 187–192)  
52 (Pogenberg et al., 2012). A novel splice variant of MITF-M, the MITF-Mdel has also

53 been identified, this variant apart from lacking the six amino acid sequence of the MITF  
54 – variant also lacks an additional 54 amino acids (residues 32-87) leading to the  
55 elimination of the serine 73 (Ser73) phosphorylation site present in the exon 2B of MITF  
56 (Wang et al, 2010). Studies in mice have shown that deletion of domains in the exon 2B  
57 does not affect the function of MITF (Bauer et al., 2009). Previous studies on MITF  
58 isoforms in cell lines have highlighted their regulatory roles. For example, MITF-A which  
59 is the longest transcript has been shown to interact with HDAC and TFE3 to regulate  
60 the expression of TGF- $\alpha$  in chronic kidney disease (Laouari et al., 2012). Similarly, heart  
61 specific MITF-H is known to be essential in cardiac growth and hypertrophy (Sagi Tshori  
62 et al., 2006). Other cell lines like osteoclasts show the presence of MITF-E isoform that  
63 is regulated by RANKL transcription factor (Lu, Li, & Lin, 2010). Isoform MITF-MC has  
64 been shown to play an important role in mast cell biology (Takemoto, Yoon, & Fisher,  
65 2002). Of all the isoforms MITF-M is the shortest and the most widely studied. It is  
66 expressed abundantly in neural crest derived melanocytes and melanoma cells. MITF-  
67 M is known to be a lineage survival oncogene and plays an essential role in tumor cell  
68 survival and progression (Garraway et al., 2005). Along with being involved in various  
69 processes like melanosome biogenesis, melanosome transport and melanocyte  
70 dendricity (Cheli et al, 2010), MITF has also been shown to be involved in autophagy  
71 and DNA damage repair (Katrín Möller, 2017; Strub et al., 2011). Furthermore, the link  
72 between UV damage and pigmentation response via regulation by MITF has been well  
73 studied (D’Orazio, 2013; Fell et al, 2014; Seoane et al., 2019; Xia et al., 2017).  
74 However, the MITF-mediated DNA damage response other than to ultraviolet radiation  
75 has not been fully examined.

## 76 **Results and Discussion**

77 We wished to explore the global transcriptional response of the Skmel28 melanoma cell  
78 line to the double strand break inducing compound, Neocarzinostatin (NCS) in the  
79 presence and absence of MITF. We used siRNA mediated knockdown of MITF followed  
80 by treatment with 2  $\mu$ M of NCS for a duration of 1hr and 4hr in order to identify the DNA  
81 damage genes that might be regulated by MITF. The control scrambled siRNA and  
82 siMITF cells with and without the NCS treatments were harvested and RNA isolation

83 was carried out. The RNA samples were analyzed using a bioanalyzer and all samples  
84 were found to have an RNA integrity of 9.8 and higher. Paired end library sequencing  
85 was carried out on the Illumina platform. The RNA-seq data was analysed using the  
86 Kallisto (v 0.43) program (Bray et al; 2016) with the Ensembl human transcriptome  
87 release-94 as a reference and using 30 bootstrap samples. The abundance estimates  
88 of each transcript was then analysed using Sleuth (v 0.3) (Pimentel et al., 2017) and  
89 likelihood ratio test used to estimate differential expression and to obtain q-values for  
90 each transcript. The log2fold change was calculated using the beta estimate value.

91 The expression values of the MITF transcripts were examined under all conditions. We  
92 observed that along with the expected reduction in gene expression for the MITF-M  
93 isoform in the MITF knockdown sample, there was also a reduction in the MITF-A  
94 isoform (Table 1) A recent study also reports the presence of MITF-A in melanocytes  
95 (Flesher et al., 2020). Interestingly, we observed the increased expression of MITF-  
96 Mdel isoform upon knockdown of MITF (Table 1). We examined in detail all the Refseq  
97 sequences identified by the three silencer select siRNAs targeting MITF from  
98 Thermofisher (S8790, S8791 and S8792) and observed that although all the siRNAs  
99 target the isoforms -M, -A, -C, -H, transcript variant 5, and transcript variant 7, the  
100 siMITF S8792 that was used for the RNA-seq study did not target the MITF-Mdel  
101 isoform (Sup Table 1). We validated the RNA-seq results by performing RT-qPCR using  
102 the MITF and MITF-Mdel specific primers (Wang et al., 2010) in the RNA-seq samples  
103 and observed a threefold increase in the expression of the MITF-Mdel mRNA upon  
104 knockdown of MITF (Fig. 1). The expression levels of MITF mRNA using RT-qCR  
105 primers recognizing isoforms-M, -A, -H, -C, -Mdel, Variant 5, and Variant 7 (Sup Table  
106 2) showed ~50% decrease in expression after being treated with siMITF S8792 (Fig.1).  
107 Interestingly, another study using the same siRNA for MITF knockdown in Skmel28 has  
108 also shown ~50% knockdown efficiency at the mRNA level (Katrin Möller et al., 2019).  
109 The presence of an enriched MITF-Mdel fraction in cells treated with siMITF S8792  
110 could be one reason for observing low knockdown efficiency at the mRNA level on  
111 using the S8792 siRNA and carrying out RT-qPCR using primers recognizing all  
112 isoforms. An unpublished RNA-seq study from our center using this siRNA on the  
113 501mel melanoma cell line also showed similar results, with MITF-M and MITF-A

114 showing a decreased expression with log2 fold change of -3.27 and -3.52 respectively  
115 and MITF-Mdel showing an increased expression with log2 fold change of 1.35. This  
116 leads us to believe that the increased expression of MITF-Mdel on MITF knockdown  
117 with S8792 is not a cell line specific artifact.

118 The previous study that identified the MITF-Mdel variant had predicted its protein size to  
119 be 357 aa (Wang et al., 2010). However, the study lacked any confirmatory  
120 experiments. Given that most of the available MITF antibodies identify all isoforms, it  
121 has been notoriously difficult to examine specific isoforms. However, when examining  
122 our MITF immunoblots, we indeed observed a band at 40kDa in 501mel cells treated  
123 with siMITF-S8792. Further, in accordance with the RNA-Seq data the band was  
124 enriched in the knockdown sample (Fig. 1B). This 40kDa band might go unnoticed in  
125 immunoblot experiments using beta actin (42kDa) as control, with both protein bands  
126 migrating closely. Interestingly, a recent study using the (CRISPR)-Cas9 technique in  
127 order to generate MITF knockout Skmel28 cell lines also shows a 40KDa truncated  
128 protein in one of the knockout cell lines targeting a region in exon2 (Dilshat et al., 2020)  
129 . Further investigations are required to confirm if these truncated proteins are indeed  
130 MITF-Mdel and its functional role.

131 Our RNA-seq study also showed increased expression of the MITF-C and the MITF-  
132 Mdel isoform under conditions of DNA damage (Table 1). Considering that the siMITF  
133 S8792 also targets the -C isoform it is interesting to note that its expression levels are  
134 nevertheless increased on MITF knockdown followed by double strand break induction.  
135 This hints at the possible enrichment of the existing pool of the MITF-C transcript under  
136 conditions of DNA damage. The MITF-Mdel shows a further additive increase in  
137 expression on both MITF knockdown and induction of DNA damage (Table 1).

138 In summary, we find the MITF-Mdel variant was enriched upon depletion of the other  
139 MITF isoforms in two melanoma cell lines. Additionally, we also observe the increased  
140 expression of MITF-Mdel and MITF-C on inducing double strand break. A recent review  
141 states that little is known about the regulation of the upstream promoters of non-  
142 melanocyte isoforms (Goding & Arnheiter, 2019). It is therefore useful to identify these  
143 isoforms in the context of biological processes like DNA damage, in order to allow for

144 their focused study in melanoma as well as non-melanoma cell lines. These kinds of  
145 studies can be facilitated by using RNA-seq data analysis programs that incorporate  
146 transcript-based abundance estimates.

147

#### 148 **Acknowledgements:**

149 The authors would like to thank Professor Eiríkur Steingrímsson for research support.  
150 This work was supported by grants from the Research fund of Iceland. We thank  
151 deCODE genetics, Iceland, for kind assistance with RNA sequencing.

152

#### 153 **References**

154 Atacho, D. A. M., Reynisson, H., Petursdottir, A. T., Eysteinnsson, T., Steingrímsson, E.,  
155 & Petersen, P. H. (2020). Mitf links neuronal activity and long-term homeostatic  
156 intrinsic plasticity. *Eneuro*, ENEURO.0412-19.2020.  
157 <https://doi.org/10.1523/ENEURO.0412-19.2020>

158 Bauer, G. L., Praetorius, C., Bergsteinsdóttir, K., Hallsson, J. H., Gísladóttir, B. K.,  
159 Schepsky, A., ... Steingrímsson, E. (2009). The role of MITF phosphorylation sites  
160 during coat color and eye development in mice analyzed by bacterial artificial  
161 chromosome transgene rescue. *Genetics*, 183(2), 581–594.  
162 <https://doi.org/10.1534/genetics.109.103945>

163 Bharti, K., Liu, W., Csermely, T., Bertuzzi, S., & Arnheiter, H. (2008). Alternative  
164 promoter use in eye development: the complex role and regulation of the  
165 transcription factor MITF. *Development*, 135(6), 1169–1178.  
166 <https://doi.org/10.1242/dev.014142>

167 Bray, N. L., Pimentel, H., Melsted, P., & Pachter, L. (2016). Near-optimal probabilistic  
168 RNA-seq quantification. *Nature Biotechnology*, 34(5), 525–527.  
169 <https://doi.org/10.1038/nbt.3519>

170 Cheli, Y., Ohanna, M., Ballotti, R., & Bertolotto, C. (2010). Fifteen-year quest for  
171 microphthalmia-associated transcription factor target genes. *Pigment Cell and*  
172 *Melanoma Research*, 23(1), 27–40. [https://doi.org/10.1111/j.1755-](https://doi.org/10.1111/j.1755-148X.2009.00653.x)  
173 [148X.2009.00653.x](https://doi.org/10.1111/j.1755-148X.2009.00653.x)

174 D'Orazio, J., Jarrett, S., Amaro-Ortiz, A., & Scott, T. (2013). UV radiation and the skin.  
175 *International Journal of Molecular Sciences*, Vol. 14, pp. 12222–12248.  
176 <https://doi.org/10.3390/ijms140612222>

177 Dilshat, R., Fock, V., Kenny, C., Gerritsen, I., Lasseur, R. M. J., Travnickova, J., ...  
178 Steingrímsson, E. (2020). MITF reprograms the extracellular matrix and focal  
179 adhesion in melanoma. *BioRxiv*, 2020.07.14.202291.  
180 <https://doi.org/10.1101/2020.07.14.202291>

- 181 Fell, G. L., Robinson, K. C., Mao, J., Woolf, C. J., & Fisher, D. E. (2014). Skin  $\beta$ -  
182 endorphin mediates addiction to UV light. *Cell*, 157(7), 1527–1534.  
183 <https://doi.org/10.1016/j.cell.2014.04.032>
- 184 Flesher, J. L., Paterson-Coleman, E. K., Vasudeva, P., Ruiz-Vega, R., Marshall, M.,  
185 Pearlman, E., ... Ganesan, A. K. (2020). Delineating the role of MITF isoforms in  
186 pigmentation and tissue homeostasis. *Pigment Cell and Melanoma Research*,  
187 33(2), 279–292. <https://doi.org/10.1111/pcmr.12828>
- 188 Garraway, L. A., Widlund, H. R., Rubin, M. A., Getz, G., Berger, A. J., Ramaswamy, S.,  
189 ... Sellers, W. R. (2005). Integrative genomic analyses identify MITF as a lineage  
190 survival oncogene amplified in malignant melanoma. *Nature*, 436(7047), 117–122.  
191 <https://doi.org/10.1038/nature03664>
- 192 Goding, C. R., & Arnheiter, H. (2019, August 1). Mitf—the first 25 years. *Genes and*  
193 *Development*, Vol. 33, pp. 983–1007. <https://doi.org/10.1101/gad.324657.119>
- 194 Laouari, D., Burtin, M., Phelep, A., Bienaime, F., Noel, L. H., Lee, D. C., ... Terzi, F.  
195 (2012). A transcriptional network underlies susceptibility to kidney disease  
196 progression. *EMBO Molecular Medicine*, 4(8), 825–839.  
197 <https://doi.org/10.1002/emmm.201101127>
- 198 Levy, C., & Fisher, D. E. (2011). Dual roles of lineage restricted transcription factors: the  
199 case of MITF in melanocytes. *Transcription*, 2(1), 19–22.  
200 <https://doi.org/10.4161/trns.2.1.13650>
- 201 Lu, S. Y., Li, M., & Lin, Y. L. (2010). Mitf induction by RANKL is critical for  
202 osteoclastogenesis. *Molecular Biology of the Cell*, 21(10), 1763–1771.  
203 <https://doi.org/10.1091/mbc.E09-07-0584>
- 204 Möller, Katrín. (2017). *The role of MITF in autophagy regulation in melanoma*.
- 205 Möller, Katrin, Sigurbjornsdottir, S., Arnthorsson, A. O., Pogenberg, V., Dilshat, R.,  
206 Fock, V., ... Ögmundsdóttir, M. H. (2019). MITF has a central role in regulating  
207 starvation-induced autophagy in melanoma. *Scientific Reports*, 9(1), 1055.  
208 <https://doi.org/10.1038/s41598-018-37522-6>
- 209 Pimentel, H., Bray, N. L., Puente, S., Melsted, P., & Pachter, L. (2017). Differential  
210 analysis of RNA-seq incorporating quantification uncertainty. *Nature Methods*,  
211 14(7), 687–690. <https://doi.org/10.1038/nmeth.4324>
- 212 Pogenberg, V., Ögmundsdóttir, M. H., Bergsteinsdóttir, K., Schepsky, A., Phung, B.,  
213 Deineko, V., ... Wilmanns, M. (2012). Restricted leucine zipper dimerization and  
214 specificity of DNA recognition of the melanocyte master regulator MITF. *Genes and*  
215 *Development*, 26(23), 2647–2658. <https://doi.org/10.1101/gad.198192.112>
- 216 Seoane, M., Buhs, S., Iglesias, P., Strauss, J., Puller, A. C., Müller, J., ... Horstmann,  
217 M. A. (2019). Lineage-specific control of TFIIH by MITF determines transcriptional  
218 homeostasis and DNA repair. *Oncogene*. [https://doi.org/10.1038/s41388-018-0661-](https://doi.org/10.1038/s41388-018-0661-x)  
219 x
- 220 Steingrímsson, E., Copeland, N. G., & Jenkins, N. A. (2004). Melanocytes and the

- 221 Microphthalmia Transcription Factor Network . *Annual Review of Genetics*, 38(1),  
222 365–411. <https://doi.org/10.1146/annurev.genet.38.072902.092717>
- 223 Strub, T., Giuliano, S., Ye, T., Bonet, C., Keime, C., Kobi, D., ... Davidson, I. (2011).  
224 Essential role of microphthalmia transcription factor for DNA replication, mitosis and  
225 genomic stability in melanoma. *Oncogene*, 30(20), 2319–2332.  
226 <https://doi.org/10.1038/onc.2010.612>
- 227 Takemoto, C. M., Yoon, Y. J., & Fisher, D. E. (2002). The identification and functional  
228 characterization of a novel mast cell isoform of the microphthalmia-associated  
229 transcription factor. *The Journal of Biological Chemistry*, 277(33), 30244–30252.  
230 <https://doi.org/10.1074/jbc.M201441200>
- 231 Tshori, S., Sonnenblick, A., Yannay-Cohen, N., Kay, G., Nechushtan, H., & Razin, E.  
232 (2007). Microphthalmia Transcription Factor Isoforms in Mast Cells and the Heart.  
233 *Molecular and Cellular Biology*, 27(11), 3911–3919.  
234 <https://doi.org/10.1128/mcb.01455-06>
- 235 Tshori, Sagi, Gilon, D., Beerli, R., Nechushtan, H., Kaluzhny, D., Pikarsky, E., & Razin,  
236 E. (2006). Transcription factor MITF regulates cardiac growth and hypertrophy. *The*  
237 *Journal of Clinical Investigation*, 116(10), 2673–2681.  
238 <https://doi.org/10.1172/JCI27643>
- 239 Vu, H. N., Dilshat, R., Fock, V., & Steingrímsson, E. (2020). User guide to MiT-TFE  
240 isoforms and post-translational modifications. *Pigment Cell and Melanoma*  
241 *Research*. <https://doi.org/10.1111/pcmr.12922>
- 242 Wang, Y., Radfar, S., Liu, S., Riker, A. I., & Khong, H. T. (2010). Mitf-Mdel, a novel  
243 melanocyte/melanoma-specific isoform of microphthalmia-associated transcription  
244 factor-M, as a candidate biomarker for melanoma. *BMC Medicine*, 8.  
245 <https://doi.org/10.1186/1741-7015-8-14>
- 246 Xia, M., Chen, K., Yao, X., Xu, Y., Yao, J., Yan, J., ... Wang, G. (2017). Mediator  
247 MED23 Links Pigmentation and DNA Repair through the Transcription Factor  
248 MITF. *Cell Reports*, 20(8), 1794–1804. <https://doi.org/10.1016/j.celrep.2017.07.056>
- 249  
250  
251  
252  
253  
254  
255  
256  
257  
258



259  
260  
261  
262  
263  
264  
265  
266  
267  
268

WITHDRAWN  
see manuscript DOI for details

269  
270  
271  
272  
273  
274  
275  
276  
277  
278  
279  
280  
281  
282  
283  
284  
285  
286  
287  
288  
289  
290  
291  
292  
293  
294  
295  
296

**Table 1. MITF Transcripts identified from RNA-seq under different conditions**

| <b>Transcript_ID</b>  | <b>Isoform</b> | <b>log2<br/>Fold change</b> |
|-----------------------|----------------|-----------------------------|
| <b>siMITF</b>         |                |                             |
| ENST00000314557.10    | MITF-M         | -1.72                       |
| ENST00000352241.8     | MITF-A         | -1.58                       |
| ENST00000531774.1     | MITF-Mdel      | 1.83                        |
| <b>NCS 1h</b>         |                |                             |
| ENST00000328528.10    | MITF-C         | 1.45                        |
| ENST00000314557.10    | MITF-M         | 0.71                        |
| ENST00000531774.1     | MITF-Mdel      | 1.33                        |
| <b>siMITF+ NCS 1h</b> |                |                             |
| ENST00000531774.1     | MITF-Mdel      | 2.45                        |
| ENST00000352241.8     | MITF-A         | -1.46                       |
| ENST00000328528.10    | MITF-C         | 1.03                        |
| ENST00000394348.2     | Variant 8      | 0.70                        |
| ENST00000314557.10    | MITF-M         | -1.24                       |
| <b>siMITF+ NCS 4h</b> |                |                             |
| ENST00000352241.8     | MITF-A         | -2.36                       |
| ENST00000314557.10    | MITF-M         | -2.76                       |
| ENST00000531774.1     | MITF-Mdel      | 1.20                        |
| ENST00000328528.10    | MITF-C         | -0.77                       |

297

## 298 Figure legend

299 **Figure 1(A).** RT qPCR validation for RNAseq data was carried out on the siMITF S8792 treated  
300 RNA that was converted to cDNA using manufacturer's protocol. The decrease in MITF level  
301 and increase in MITF-Mdel is statistically significant over three technical replicates with with p-  
302 value < 0.001. The geometric mean of beta actin and HPRT housekeeping genes was used as  
303 endogenous control for normalization. Fold change was calculated using the  $2^{-\Delta\Delta ct}$  method **(B)**  
304 western blot image of MITF protein in sicontrol vs siMITF in lysates from 501Mel cells, siRNA  
305 used against MITF is S8792. SMC1 is used as the loading control (SMC1 antibody- abcam,  
306 ab9262, MITF antibody-Thermo Scientific, MS771).

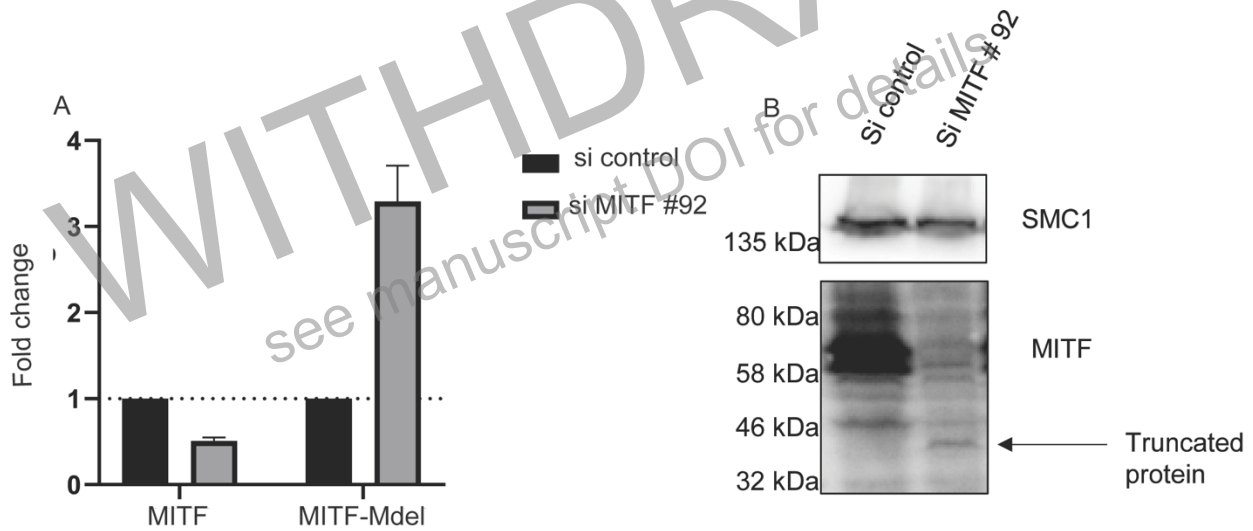

307

308

309

310

311

312

313

314

315

316

317

318

319 **Supplementary information:**

320

321 **Supplementary Table 1** Refseq identified by siRNAs against MITF (Thermofisher.com)

| s8790          | s8791          | s8792          | Isoform                                             |
|----------------|----------------|----------------|-----------------------------------------------------|
| NM_000248.3    | NM_000248.3    | NM_000248.3    | MITF-M                                              |
| NM_001184967.1 | NM_001184967.1 | NM_001184967.1 | Transcript variant 7                                |
| NM_006722.2    | NM_006722.2    | NM_006722.2    | MITF-C                                              |
| NM_198158.2    | NM_198158.2    | NM_198158.2    | Transcript variant 5                                |
| NM_198159.2    | NM_198159.2    | NM_198159.2    | MITF-A                                              |
| NM_198177.2    | NM_198177.2    | NM_198177.2    | MITF-H                                              |
| NM_198178.2    | NM_198178.2    | NM_001184968.1 | S8790, 8791(MITF-Mdel) S8792 (transcript variant 8) |

322

323

324

325 **Supplementary Table 2** Primers used for qRT-PCR

| Primer | Sequence 5'-3'             | Isoforms identified                                                                          |
|--------|----------------------------|----------------------------------------------------------------------------------------------|
| F1     | CGACAGAAGAACTGGAGCAC       | NM_198159.3 (MITF-A)<br>NM_198177.3 (MITF-H)<br>NM_006722.2 (MITF-C)<br>NM_000248.4 (MITF-M) |
| R1     | AAATCTGGAGAGCAGAGACCC      | NM_198158.3 ( Variant 5)<br>NM_198178.3 (MITF-Mdel)<br>NM_001184967.2 (Variant 7)            |
| F2     | TTATAGTACCTTCTCTTTGCCAGTCC |                                                                                              |
| R2     | CTTATAAAATCCCTGCCGTTGG     | NM_198178.3 (MITF-Mdel)                                                                      |

326
